# Supplementary material for: Antitumor Effects of Poplar Propolis on DLBCL SU-DHL-2 Cells
Source: MDPI journal article supplement (doi:10.3390/foods12020283), 2023-01-07
Supplement: s1 [file s1]

**Supplement table S1**

**Table S1.** Primers sequence for RT-PCR

| Primer      | Sequence (5'→3')         |
|-------------|--------------------------|
| β-actin-F   | GATCATTGCTCCTCCTGAGC     |
| β-actin-R   | ACTCCTGCTTGCTGATCCAC     |
| POLG2-F     | TTCTGGTTACGTCATCGACTCC   |
| POLG2-R     | GTTTCCTTTCCGGCCTTCTTC    |
| UGDH-F      | TTATTTCTGTGCTGTCCAACCCT  |
| UGDH-R      | CTGGCCCTCTGGAGTTTCAT     |
| HO-1-F      | TCTTGGCTGGCTTCCTTACC     |
| HO-1-R      | GGATGTGCTTTTCGTTGGGG     |
| NQO1-F      | TGAAAGGCTGGTTTGAGCGA     |
| NQO1-R      | TCCAGGCGTTTCTTCCATCC     |
| PPP1CC-F    | GACTGGCTTGACCTTCCCT      |
| PPP1CC-R    | TCAACTTCAATTCAGGCCGC     |
| TNFRSF10B-F | TGGTCAAGGTCGGTGATTGT     |
| TNFRSF10B-R | GATGCCTGAGAGAGAACAGGG    |
| ALG8-F      | CCCCACATACCATTCCACAGA    |
| ALG8-R      | CGTCCACTCTGAAGTTGCCT     |
| NADK2-F     | CACTTAACCTCTGCCCCGTCC    |
| NADK2-R     | TCGGTAGCAAGTCATCGTGG     |
| GCL-F       | AGGTCAAACCCAACCCAGT      |
| GCL-R       | TGTAAAGTACTGAAGCGAGG     |
| BUB1B-F     | GGATGGGTCCTTCTGGAAACT    |
| BUB1B-R     | GTGGCCTCATCATTGGCATTC    |
| RASSF6-F    | GGCACTGGTTTCCCTCTACC     |
| RASSF6-R    | TTCACCATCGTTGTTCCGGCT    |
| TK1-F       | GGCACAGAGAAGGAGCAGATT    |
| TK1-R       | CAGCCACACAAAGGAGAGTTC    |
| VNN3-F      | GTGGTGGTGGTGGATGAGTT     |
| VNN3-R      | AATGGAAGGGAACAGCCGAG     |
| FTH1-F      | CAGAACTACCACCAGGACTCA    |
| FTH1-R      | TCAAAGCCACATCATCGCGG     |
| HSP70-F     | GTGTAACCCCATCATCAGCG     |
| HSP70-R     | GCTCCAAAACAAAAACAGCAATCT |
| PPP4R3C-F   | TATGACGAGCAGTTCCAGGG     |
| PPP4R3C-R   | AGGTATCTGTGACCGCAGGA     |
| P62-F       | TACCAGGACAGCGAGAGGAAG    |
| P62-R       | ATCCTTTCTCAAGCCCCATGT    |
| TANK-F      | AGCATTGTTAGAGCCTGTGGAA   |
| TANK-R      | TGAGTTGCTCGCCAATGTTT     |
| NDUFS3-F    | GCTTTCCCAGTCTATCGCCA     |
| NDUFS3-R    | GCGCTGTCTAGGATCCACAT     |
| CTU1-F      | GGAGCGTGACTTGATGGACA     |
| CTU1-R      | CCGTGGTGGAGACGAAATGA     |

Cyclin B-F  
Cyclin B-R  
PLK1-F  
PLK1-R

GATACTGCCTCTCCAAGCC  
GCACACAATTATTCTCAAGTTGTC  
CCTGCACCCGAAACCGAGTTA  
ACCTCGAAACTGTGCCCTTT

## Supplement table S2

**Table S2.** Components in EEP

| No | tR<br>(min) | λ <sub>max</sub><br>(nm) | Selected<br>ion | Elemental<br>composition                        | Measured<br>mass | Calculated<br>mass | Mass<br>error | MS/MS<br>fragmentation                                 | Identification                                                      |
|----|-------------|--------------------------|-----------------|-------------------------------------------------|------------------|--------------------|---------------|--------------------------------------------------------|---------------------------------------------------------------------|
| 1  | 2.52        | 236,<br>279,<br>313      | [M-H]           | C <sub>7</sub> H <sub>6</sub> O <sub>3</sub>    | 137.0237         | 137.0239           | 0.6           | 137.0245                                               | p-Hydroxybenzoic acid) <sup>b</sup>                                 |
| 2  | 3.29        | 241,<br>323              | [M-H]           | C <sub>9</sub> H <sub>6</sub> O <sub>4</sub>    | 179.0341         | 179.0344           | -0.3          | 179.0341, 135.0443                                     | Caffeic acid <sup>a, b, c</sup>                                     |
| 3  | 3.94        | 237,<br>310              | [M-H]           | C <sub>9</sub> H <sub>6</sub> O <sub>3</sub>    | 163.0392         | 163.0395           | -0.3          | 163.0392, 119.0494                                     | p-Coumaric acid <sup>b, c</sup>                                     |
| 4  | 4.33        | 243,<br>323              | [M-H]           | C <sub>10</sub> H <sub>10</sub> O <sub>4</sub>  | 193.0498         | 193.0501           | -0.3          | 193.0498, 133.0291                                     | Isoferulic acid <sup>b, c</sup>                                     |
| 5  | 4.54        | 244,<br>323              | [M-H]           | C <sub>10</sub> H <sub>10</sub> O <sub>4</sub>  | 193.0494         | 193.0501           | -0.7          | 193.0494, 134.0366                                     | Ferulic acid <sup>a, b, c</sup>                                     |
| 6  | 5.79        | 265                      | [M-H]           | C <sub>21</sub> H <sub>20</sub> O <sub>10</sub> | 431.0975         | 431.0978           | -0.3          | 431.0975, 268.0372,<br>239.0372, 211.0394,<br>167.0493 | Apigenin-7-O-β-D-<br>glucopyranoside <sup>b</sup>                   |
| 7  | 6.81        | 249,<br>347              | [M-H]           | C <sub>15</sub> H <sub>10</sub> O <sub>6</sub>  | 285.0400         | 285.0399           | 0.1           | 285.0400, 571.0873                                     | Luteolin <sup>a, b</sup>                                            |
| 8  | 6.90        | 250,<br>368              | [M-H]           | C <sub>15</sub> H <sub>10</sub> O <sub>7</sub>  | 301.0352         | 301.0348           | 0.4           | 301.0352, 285.0759                                     | quercetin <sup>a, b</sup>                                           |
| 9  | 7.25        | 231,<br>287              | [M-H]           | C <sub>16</sub> H <sub>14</sub> O <sub>5</sub>  | 285.0783         | 285.0763           | 2.0           | 285.0783, 267.0668,<br>252.0437, 239.0722,<br>138.0326 | Pinobanksin-methyl ether <sup>b</sup>                               |
| 10 | 7.55        | 252,<br>354              | [M-H]           | C <sub>16</sub> H <sub>14</sub> O <sub>7</sub>  | 315.0506         | 315.0505           | 0.1           | 315.0506, 300.0273,<br>271.0244                        | Quercetin-3-methyl ether <sup>b, c</sup>                            |
| 11 | 8.64        | 266,<br>340              | [M-H]           | C <sub>15</sub> H <sub>10</sub> O <sub>5</sub>  | 269.0453         | 269.0450           | 0.3           | 269.0463                                               | Apigenin <sup>a</sup>                                               |
| 12 | 8.92        | 291                      | [M-H]           | C <sub>15</sub> H <sub>12</sub> O <sub>5</sub>  | 271.0615         | 271.0606           | 0.9           | 271.0615                                               | Pinobanksin <sup>b, c</sup>                                         |
| 13 | 9.08        | 249,<br>265,<br>367      | [M-H]           | C <sub>15</sub> H <sub>10</sub> O <sub>6</sub>  | 285.0401         | 285.0399           | 0.2           | 285.0401                                               | Kaempferol <sup>a, b</sup>                                          |
| 14 | 9.29        | 285                      | [M-H]           | C <sub>16</sub> H <sub>14</sub> O <sub>4</sub>  | 269.0818         | 269.0814           | 0.4           | 269.0818, 254.0577                                     | Pinobanksin-5-methyl ether <sup>b, c</sup>                          |
| 15 | 10.08       | 266,<br>292,<br>347      | [M-H]           | C <sub>16</sub> H <sub>14</sub> O <sub>6</sub>  | 299.0556         | 299.0556           | 0             | 299.0556, 284.0321,<br>271.0608                        | Kaempferol-3-methyl ether <sup>b, c</sup>                           |
| 16 | 10.67       | 252,<br>353              | [M-H]           | C <sub>17</sub> H <sub>14</sub> O <sub>7</sub>  | 329.0664         | 329.0661           | 0.3           | 314.0426, 299.0193                                     | Quercetin-dimethyl ether <sup>b, c</sup>                            |
| 17 | 11.43       | 310                      | [M-H]           | C <sub>16</sub> H <sub>12</sub> O <sub>5</sub>  | 283.0603         | 283.0606           | -0.3          | 283.0363, 239.0363,<br>211.0405, 167.0523              | 4-[4-(1E)-2-<br>Carboxyethenyl]phenoxy]benzoic<br>acid <sup>b</sup> |
| 18 | 11.70       | 289                      | [M-H]           | C <sub>18</sub> H <sub>16</sub> O <sub>6</sub>  | 327.0863         | 327.0869           | -0.6          | 327.0863, 285.0754,<br>267.0652                        | Pinobanksin-5-methyl ether-3-O-<br>acetate <sup>b, c</sup>          |
| 19 | 12.39       | 253,<br>366              | [M-H]           | C <sub>16</sub> H <sub>10</sub> O <sub>6</sub>  | 315.0507         | 315.0505           | 0.2           | 315.0507, 299.055                                      | Isorhamnetin <sup>b, c</sup>                                        |

|    |        |             |          |                                                |          |          |      |                                           |                                                                                      |
|----|--------|-------------|----------|------------------------------------------------|----------|----------|------|-------------------------------------------|--------------------------------------------------------------------------------------|
| 20 | 13.85  | 254,<br>355 | [M-H]    | C <sub>17</sub> H <sub>14</sub> O <sub>7</sub> | 329.0659 | 329.0661 | -0.2 | 329.0659, 314.0426,<br>299.0191, 271.0242 | Quercetin-dimethyl ether isomer <sup>b, c</sup>                                      |
| 21 | 14.89  | 245,<br>326 | [M-H]    | C <sub>14</sub> H <sub>16</sub> O <sub>4</sub> | 247.0968 | 247.0970 | -0.2 | 247.0968, 179.0342,<br>161.0236, 135.0443 | Caffeic acid isoprenyl ester <sup>b, c</sup>                                         |
| 22 | 15.36  | 267,<br>313 | [M-H]    | C <sub>15</sub> H <sub>10</sub> O <sub>4</sub> | 253.0502 | 253.0501 | 0.1  | 253.0502, 143.0496                        | Chrysin <sup>a, b</sup>                                                              |
| 23 | 15.56  | 245,<br>325 | [M-H]    | C <sub>14</sub> H <sub>16</sub> O <sub>4</sub> | 247.0977 | 247.0970 | 0.7  | 247.0977, 133.0289                        | Caffeic acid isoprenyl ester<br>(isomer <sup>b, c</sup> )                            |
| 24 | 15.70  | 245,<br>326 | [M-H]    | C <sub>16</sub> H <sub>14</sub> O <sub>4</sub> | 269.0815 | 269.0814 | 0.1  | 269.0815, 178.0262,<br>161.0235, 133.0287 | Caffeic acid benzyl ester <sup>b, c</sup>                                            |
| 25 | 16.31  | 231,<br>289 | [M-H]    | C <sub>15</sub> H <sub>12</sub> O <sub>4</sub> | 255.0659 | 255.0657 | 0.2  | 255.0659                                  | Pinocembrin <sup>b, c</sup>                                                          |
| 26 | 16.81  | 265,<br>359 | [M-H]    | C <sub>15</sub> H <sub>10</sub> O <sub>5</sub> | 269.0451 | 269.0450 | 0.1  | 269.0451, 143.0493                        | Galangin <sup>a, b</sup>                                                             |
| 27 | 17.45  | 289         | [M-H]    | C <sub>16</sub> H <sub>14</sub> O <sub>5</sub> | 285.0765 | 285.0763 | 0.2  | 285.0765, 269.0452                        | isomer <sup>b, e</sup>                                                               |
| 28 | 17.79  | 231,<br>293 | [M-H]    | C <sub>17</sub> H <sub>14</sub> O <sub>6</sub> | 313.0718 | 313.0712 | 0.5  | 313.0764, 283.1015,<br>271.0629, 253.0555 | Pinobanksin-3-O-acetate <sup>b, c</sup>                                              |
| 29 | 18.57  | 265         | [M-H]    | C <sub>16</sub> H <sub>12</sub> O <sub>5</sub> | 283.0608 | 283.0606 | 0.2  | 283.0608, 268.0405                        | Acacetin <sup>b, c</sup>                                                             |
| 30 | 20.78  | 310         | [M-H]    | C <sub>16</sub> H <sub>14</sub> O <sub>3</sub> | 253.0866 | 253.0863 | 0.3  | 253.0866, 145.0341,<br>117.0368           | p-Coumaric acid benzyl ester <sup>b, d</sup>                                         |
| 31 | 21.52  | 248,<br>326 | [M-H]    | C <sub>18</sub> H <sub>16</sub> O <sub>4</sub> | 296.0969 | 295.0970 | -0.1 | 295.0969, 133.0288                        | Caffeic acid cinnamyl ester <sup>b, c</sup>                                          |
| 32 | 21.82  | 245,<br>325 | [M-H]    | C <sub>18</sub> H <sub>16</sub> O <sub>4</sub> | 297.1118 | 297.1127 | -0.9 | 297.1118, 179.0340,<br>161.0235, 133.0286 | Caffeic acid phenylpropyl ester <sup>e</sup>                                         |
| 33 | 22.97  | 292         | [M-H]    | C <sub>18</sub> H <sub>16</sub> O <sub>6</sub> | 327.0874 | 327.0869 | 0.5  | 327.0874, 253.0507                        | Pinobanksin-3-O-propionate <sup>b, c</sup>                                           |
| 34 | 26.87  | 250,<br>309 | [M-H]    | C <sub>18</sub> H <sub>16</sub> O <sub>3</sub> | 279.1027 | 279.1023 | 0.4  | 279.1023, 117.0368                        | p-Coumaric cinnamyl ester <sup>b, d</sup>                                            |
| 35 | 27.82  | 251,<br>291 | [M-H]    | C <sub>19</sub> H <sub>18</sub> O <sub>6</sub> | 341.1026 | 341.1025 | 0.41 | 341.1026, 253.0505,<br>197.0633, 143.0532 | Pinobanksin-3-O-butyrate <sup>b, c</sup>                                             |
| 36 | 28.12  | 291         | [M-H]    | C <sub>20</sub> H <sub>18</sub> O <sub>6</sub> | 353.1026 | 353.1025 | 0.1  | 353.1026, 253.0523                        | Pinobanksin-3-O-pentanoate <sup>b, c</sup>                                           |
| 37 | 28.58  | 251,<br>289 | [M-H]    | C <sub>27</sub> H <sub>24</sub> O <sub>8</sub> | 475.1389 | 475.1393 | -0.4 | 475.1389, 413.1958,<br>265.1476           | Pinobanksin-3-O-acetate-5-O-<br>phydroxyphenylpropionate <sup>b, c</sup>             |
| 38 | 30.28  | 291         | [M-H]    | C <sub>20</sub> H <sub>20</sub> O <sub>6</sub> | 355.1179 | 355.1182 | -0.3 | 355.1179, 265.1517,<br>253.0523           | Pinobanksin-3-O-pentanoate or<br>2-methylbutyrate <sup>b, c</sup>                    |
| 39 | 30.43  | 291         | [M-H]    | C <sub>20</sub> H <sub>20</sub> O <sub>6</sub> | 355.1179 | 355.1182 | -0.3 | 355.1179, 253.0523                        | Pinobanksin-3-O-pentanoate or<br>2-methylbutyrate <sup>b, c</sup>                    |
| 40 | 30.91  | 291         | [M-H]    | C <sub>21</sub> H <sub>20</sub> O <sub>6</sub> | 367.1185 | 367.1182 | 0.3  | 367.1185, 315.1601,<br>265.1478, 253.0523 | Pinobanksin-O-hexanoate <sup>b, c</sup>                                              |
| 41 | 31.32  | 292         | [M-H]    | C <sub>24</sub> H <sub>20</sub> O <sub>6</sub> | 403.1184 | 403.1182 | 0.2  | 403.1184, 297.2431,<br>253.0555           | Pinobanksin-3-O-<br>phenylpropionate <sup>b, c</sup>                                 |
| 42 | 32.18  | 279         | [M-H]    | C <sub>18</sub> H <sub>30</sub> O <sub>3</sub> | 293.2122 | 293.2117 | 0.5  | 293.2122                                  | (10E, 12Z)-9-oxo-, 10, 12-<br>Octadecadienoic acid <sup>f</sup>                      |
| 43 | 32.30  | 291         | [M-H]    | C <sub>21</sub> H <sub>22</sub> O <sub>6</sub> | 369.1338 | 369.1338 | 0    | 369.1338, 309.1790,<br>253.0523           | Pinobanksin-3-O-hexanoate <sup>b, c</sup>                                            |
| 44 | 32.62  | 277         | [M-H]    | C <sub>18</sub> H <sub>30</sub> O <sub>3</sub> | 293.2117 | 293.2117 | 0.0  | 293.2117                                  | (10E, 12Z)-9-oxo-, 10, 12-<br>Octadecadienoic acid isomer <sup>f</sup>               |
| 45 | 33.14  | 290         | [M-H]    | C <sub>26</sub> H <sub>22</sub> O <sub>6</sub> | 429.1335 | 429.1338 | -0.3 | 429.1335, 271.0696,<br>253.0588           | Brevifolin-3-O-phenylpentanoate <sup>b</sup>                                         |
| 46 | 34.01  | -           | [M-H]    | C <sub>20</sub> H <sub>40</sub> O <sub>4</sub> | 343.2844 | 343.2848 | -0.4 |                                           | (3R, 8R)-3, 8-Dihydroxyeicosanoic<br>acid <sup>f</sup>                               |
| 47 | 35.267 |             | [M+HCOO] | C <sub>25</sub> H <sub>48</sub> O <sub>8</sub> | 505.3378 | 505.3377 | 0.1  | 505.3378, 495.3087,<br>459.3316           | 3-(Acetyloxy)-2-hydroxypropyl<br>(3R, 8R)-3, 8-<br>dihydroxyeicosanoate <sup>f</sup> |

|    |       |          |          |          |          |     |                    |                                                                                  |
|----|-------|----------|----------|----------|----------|-----|--------------------|----------------------------------------------------------------------------------|
| 48 | 36.37 | [M+HCOO] | C25H50O6 | 491.3585 | 491.3584 | 0.1 | 491.3585, 481.3297 | 2, 3-Dihydroxypropyl (3R, 8R)-3, 8-dihydroxydocosanoate <sup>f</sup>             |
| 49 | 37.44 | [M+HCOO] | C26H50O7 | 519.3533 | 519.3533 | 0.0 | 519.3533, 509.3248 | 3-(Acetyloxy)-2-hydroxypropyl (3R, 8R)-3, 8-dihydroxyheneicosanoate <sup>f</sup> |
| 50 | 38.49 | [M-H]    | C22H44O4 | 371.3162 | 371.3161 | 0.1 | 371.3162, 326.183  | (3R, 8R)-3, 8-Dihydroxydocosanoic acid <sup>f</sup>                              |
| 51 | 39.61 | [M+HCOO] | C28H53O9 | 533.3693 | 533.3690 | 0.3 | 533.3693, 523.3404 | 3-(Acetyloxy)-2-hydroxypropyl (3R, 8R)-3, 8-dihydroxydocosanoate <sup>f</sup>    |

aConfirmed with standard;

bconfirmed with MSn fragmentation;

cconfirmed with references: Falcão, S.I.; Vale, N.; Gomes, P.; Domingues, M.R.; Freire, C.; Cardoso, S.M.; Vilas-Boas, M. Phenolic profiling of Portuguese propolis by LC-MS spectrometry: Uncommon propolis rich in flavonoid glycosides. *Phytochemical Analysis*. 2013, 24(4), 309-318.;

<sup>d</sup>Nagaoka, T; Banskota, A.H.; Tezuka, Y.; Midorikawa, K.; Matsushige, K.; Kadota, S.. Caffeic acid phenethyl ester (CAPE) analogues: Potent nitric oxide inhibitors from the Netherlands propolis. *Biological & Pharmaceutical Bulletin*. 2003, 26, 487-491.

<sup>e</sup>Bilikova, K.; Popova, M.; Trusheva, B.; Bankova, V.A. New anti-Paenibacillus larvae substances purified from propolis. *Apidologie*. 2013, 44, 278-285.

<sup>f</sup>Bloor, S.; Catchpole, O.; Mitchell, K.; Webby, R.; Davis, P. Antiproliferative acylated glycerols from New Zealand propolis. *Journal of Natural Products*. 2019, 82, 2359-2367.

### Supplement table S3

**Table S3.** Partly differential proteins (p < 0.01)

| Gene ID    | Description of protein                                               | Regulation |
|------------|----------------------------------------------------------------------|------------|
| O60566     | Mitotic checkpoint serine/threonine-protein kinase BUB1 beta         | up         |
| Q13217     | DnaJ homolog subfamily C member 3                                    | up         |
| H6VRG1     | Keratin 1                                                            | up         |
| P58546     | Myotrophin                                                           | up         |
| Q643R0     | HCTP4                                                                | up         |
| Q13501     | Sequestosome-1                                                       | up         |
| B2R841     | Serine/threonine-protein kinase PLK                                  | up         |
| Q9HCD5     | Nuclear receptor coactivator 5                                       | up         |
| O75489     | NADH dehydrogenase [ubiquinone] iron-sulfur protein 3, mitochondrial | up         |
| P28799     | Progranulin                                                          | up         |
| P48507     | Glutamate--cysteine ligase regulatory subunit                        | up         |
| P15559     | NAD(P)H dehydrogenase [quinone] 1                                    | up         |
| O60701     | UDP-glucose 6-dehydrogenase                                          | up         |
| O43815     | Striatin                                                             | up         |
| Q99590     | Protein SCAF11                                                       | up         |
| A0A024R8N6 | Thymidine kinase                                                     | up         |
| Q96CS3     | FAS-associated factor 2                                              | up         |
| Q96CX6     | Leucine-rich repeat-containing protein 58                            | up         |
| Q71RC2     | La-related protein 4                                                 | up         |
| Q96TA2     | ATP-dependent zinc metalloprotease YME1L1                            | up         |
| J3KQ18     | D-dopachrome decarboxylase                                           | up         |
| Q0P5N8     | TMSB4X protein (Fragment)                                            | up         |
| Q9NYL4     | Peptidyl-prolyl cis-trans isomerase FKBP11                           | up         |
| O60524     | Nuclear export mediator factor NEMF                                  | up         |
| A0A1B0GUA3 | KIF-binding protein                                                  | up         |

|            |                                                                                                                        |      |
|------------|------------------------------------------------------------------------------------------------------------------------|------|
| Q6S4P3     | Ferritin                                                                                                               | up   |
| E7EW49     | CLIP-associating protein 2                                                                                             | up   |
| A0A024QZY7 | Geminin, DNA replication inhibitor, isoform CRA_a                                                                      | up   |
| Q5JRA6     | Transport and Golgi organization protein 1 homolog                                                                     | up   |
| B2R7U4     | Heme oxygenase                                                                                                         | up   |
| A8K099     | cDNA FLJ77959, highly similar to Homo sapiens protein kinase, cAMP-dependent, regulatory, type I, beta (PRKAR1B), mRNA | up   |
| P30047     | GTP cyclohydrolase 1 feedback regulatory protein                                                                       | up   |
| F8W0Q9     | Periphilin-1                                                                                                           | up   |
| B4DN80     | Peptidyl-prolyl cis-trans isomerase                                                                                    | up   |
| B4DJ38     | cDNA FLJ56092, highly similar to Pentatricopeptide repeat protein 1                                                    | up   |
| A0A024R7L2 | HSPC142 protein, isoform CRA_a                                                                                         | up   |
| Q8NBX0     | Saccharopine dehydrogenase-like oxidoreductase                                                                         | up   |
| P49593     | Protein phosphatase 1F                                                                                                 | up   |
| A0A024RAY1 | Activating transcription factor 7 interacting protein, isoform CRA_a                                                   | up   |
| Q13796     | Protein Shroom2                                                                                                        | up   |
| B2RDG9     | cDNA, FLJ96603, highly similar to Homo sapiens actin-related protein 10 homolog (S. cerevisiae) (ACTR10), mRNA         | up   |
| Q96M27     | Protein PRRC1                                                                                                          | up   |
| A0A087X0W9 | Deubiquitinase OTUD6B                                                                                                  | up   |
| M0R0P8     | Unconventional myosin-IXb                                                                                              | up   |
| Q4G0N4     | NAD kinase 2, mitochondrial                                                                                            | up   |
| A0A223PQH6 | HCFC1                                                                                                                  | down |
| Q02241     | Kinesin-like protein KIF23                                                                                             | down |
| E7EPT4     | NADH dehydrogenase [ubiquinone] flavoprotein 2, mitochondrial                                                          | down |
| B7Z8F4     | cDNA FLJ56523, highly similar to ATP-dependent RNA helicase DHX8                                                       | down |
| P43357     | Melanoma-associated antigen 3                                                                                          | down |
| Q13571     | Lysosomal-associated transmembrane protein 5                                                                           | down |
| O95067     | G2/mitotic-specific cyclin-B2                                                                                          | down |
| A0A024QZN5 | ZW10 interactor, isoform CRA_b                                                                                         | down |
| Q69YH5     | Cell division cycle-associated protein 2                                                                               | down |
| Q86WQ0     | Nuclear receptor 2C2-associated protein                                                                                | down |
| Q99504     | Eyes absent homolog 3                                                                                                  | down |
| Q9UQ13     | Leucine-rich repeat protein SHOC-2                                                                                     | down |
| Q15643     | Thyroid receptor-interacting protein 11                                                                                | down |
| Q9BZI7     | Regulator of nonsense transcripts 3B                                                                                   | down |
| Q6ZTQ3     | Ras association domain-containing protein 6                                                                            | down |
| H3BM91     | COMM domain-containing protein 4 (Fragment)                                                                            | down |
| E7EP72     | UPF0449 protein C19orf25                                                                                               | down |
| Q9H832     | Ubiquitin-conjugating enzyme E2 Z                                                                                      | down |
| Q9P086     | Mediator of RNA polymerase II transcription subunit 11                                                                 | down |
| Q2M296     | Methenyltetrahydrofolate synthase domain-containing protein                                                            | down |
| B2RBA0     | cDNA, FLJ95388, highly similar to Homo sapiens step II splicing factor SLU7 (SLU7), mRNA                               | down |
| O95498     | Vascular non-inflammatory molecule 2                                                                                   | down |
| Q8TAV0     | Protein FAM76A                                                                                                         | down |

|            |                                                                                                                        |      |
|------------|------------------------------------------------------------------------------------------------------------------------|------|
| B4DY64     | cDNA FLJ52132, highly similar to Catechol-O-methyltransferase domain-containing protein 1                              | down |
| A8K9A5     | cDNA FLJ78114, highly similar to Homo sapiens thymidylate synthetase, mRNA                                             | down |
| P20933     | N(4)-(beta-N-acetylglucosaminyl)-L-asparaginase                                                                        | down |
| Q86U28     | Iron-sulfur cluster assembly 2 homolog, mitochondrial                                                                  | down |
| Q9H8V3     | Protein ECT2                                                                                                           | down |
| E9PD50     | Protein SMG7                                                                                                           | down |
| Q96EK4     | THAP domain-containing protein 11                                                                                      | down |
| A0A024R8N6 | Thymidine kinase                                                                                                       | down |
| O94919     | Endonuclease domain-containing 1 protein                                                                               | down |
| Q643R0     | HCTP4                                                                                                                  | down |
| E7EW49     | CLIP-associating protein 2                                                                                             | down |
| A8K099     | cDNA FLJ77959, highly similar to Homo sapiens protein kinase, cAMP-dependent, regulatory, type I, beta (PRKAR1B), mRNA | down |
| Q71RC2     | La-related protein 4                                                                                                   | down |
| A0A024R7L2 | HSPC142 protein, isoform CRA_a                                                                                         | down |
| Q96CX6     | Leucine-rich repeat-containing protein 58                                                                              | down |
| B3KP18     | cDNA FLJ30946 fis, clone FEBRA2007622, highly similar to RAD50-interacting protein 1                                   | down |
| M0R0P8     | Unconventional myosin-IXb                                                                                              | down |
| A0A024QZY7 | Geminin, DNA replication inhibitor, isoform CRA_a                                                                      | down |

---
